# Supplementary material
Source: PubMed Central journal article supplement (PMC4068450)
Supplement: AAC.02352-14_zac006142898so2.pdf [file AAC.02352-14_zac006142898so2.pdf]

**S TABLE 1: Thirty-five potent actives.**

| Compound    | Average Max Fold Increase in Luminescence | EC <sub>50</sub> (μM) | Membrane activity | Structure                                                                             |
|-------------|-------------------------------------------|-----------------------|-------------------|---------------------------------------------------------------------------------------|
| MAC-0175574 | 4.10                                      | 14.51                 | —                 | 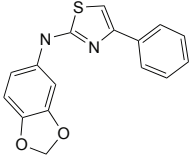   |
| MAC-0038612 | 4.25                                      | 0.01                  | —                 |    |
| MAC-0079448 | 4.91                                      | 32.40                 | —                 |    |
| MAC-0002436 | 5.03                                      | 15.29                 | +                 |   |
| MAC-0048802 | 4.29                                      | 39.30                 | —                 |  |
| MAC-0011589 | 4.37                                      | 0.01                  | +                 |  |
| MAC-0173768 | 4.77                                      | 1.93                  | —                 |  |
| MAC-0019019 | 4.78                                      | 41.90                 | +                 |  |

|             |      |       |   |                                                                                       |
|-------------|------|-------|---|---------------------------------------------------------------------------------------|
| MAC-0005082 | 4.79 | 41.20 | + | 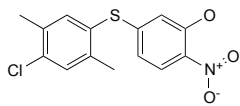   |
| MAC-0043328 | 5.01 | 11.27 | - |    |
| MAC-0158780 | 4.87 | 0.42  | + |    |
| MAC-0020108 | 5.58 | 7.13  | - |    |
| MAC-0047200 | 5.74 | 16.61 | - |   |
| MAC-0158121 | 5.25 | 21.90 | + |  |
| MAC-0172913 | 5.97 | 4.58  | - |  |
| MAC-0173775 | 5.85 | 14.98 | - |  |
| MAC-0002472 | 6.66 | 24.60 | + |  |

|             |       |       |   |                                                                                       |
|-------------|-------|-------|---|---------------------------------------------------------------------------------------|
| MAC-0171005 | 6.21  | 0.36  | — | 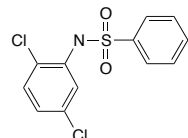   |
| MAC-0036740 | 8.00  | 6.97  | — |    |
| MAC-0080655 | 8.36  | 12.38 | — |    |
| MAC-0036904 | 8.85  | 4.38  | — |    |
| MAC-0048182 | 10.79 | 5.65  | — |   |
| MAC-0025760 | 11.85 | 2.53  | — |  |
| MAC-0004444 | 16.53 | 2.22  | + |  |
| MAC-0025767 | 17.44 | 1.38  | — |  |
| MAC-0161641 | 17.16 | 7.63  | — |  |

|             |       |      |   |  |
|-------------|-------|------|---|--|
| MAC-0042770 | 18.13 | 1.84 | — |  |
| MAC-0175940 | 18.73 | 0.18 | — |  |
| MAC-0045389 | 18.22 | 1.34 | — |  |
| MAC-0026022 | 19.91 | 4.84 | — |  |
| MAC-0177727 | 24.70 | 5.90 | — |  |
| MAC-0020111 | 25.02 | 2.62 | — |  |
| MAC-0174466 | 25.31 | 1.71 | — |  |
| MAC-0005103 | 36.86 | 0.08 | — |  |
| MAC-0170636 | 43.88 | 2.60 | — |  |
